# Supplementary material for: Supercritical CO2-assisted solid-phase etching preparation of MXenes for high-efficiency alkaline hydrogen evolution reaction
Source: Royal Society of Chemistry journal article supplement (doi:10.1039/d3gc00787a), 2023-01-01
Supplement: d3gc00787a1.pdf [file d3gc00787a1.pdf]

## Supporting Information

### Supercritical CO<sub>2</sub>-assisted Solid-Phase Etching Preparation of MXenes for High-efficiency Alkaline Hydrogen Evolution

Huajian Feng,<sup>a</sup> Qingyong Tian,<sup>a\*</sup> Junhao Huang,<sup>a</sup> Xinwei Cui,<sup>a</sup> Jingyun Jiang,<sup>b</sup> Yapeng Tian,<sup>a</sup> Li  
Ye,<sup>b</sup> Qun Xu<sup>a\*</sup>

#### Supplementary Text

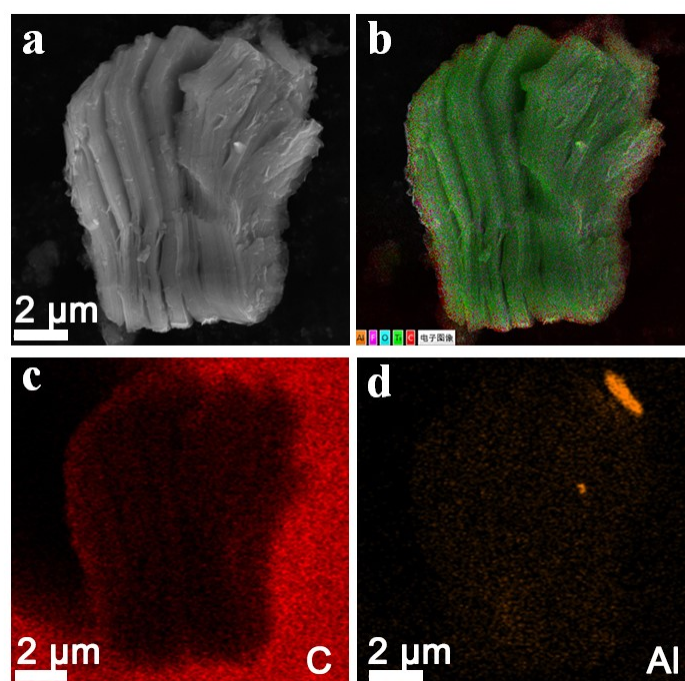

**Fig. S1.** (a-d) SEM image (a), EDS layered image (b) and elemental-mapping images (C and Al elements) (c-d) of the HCl-treated SC CO<sub>2</sub>-Ti<sub>3</sub>C<sub>2</sub>T<sub>x</sub> multilayer MXenes.

\*To whom correspondence should be addressed. Tel: +86-27-63886819. E-mail: [tianqy@zzu.edu.cn](mailto:tianqy@zzu.edu.cn) (Q. Tian) and [qunxu@zzu.edu.cn](mailto:qunxu@zzu.edu.cn) (Q. Xu).

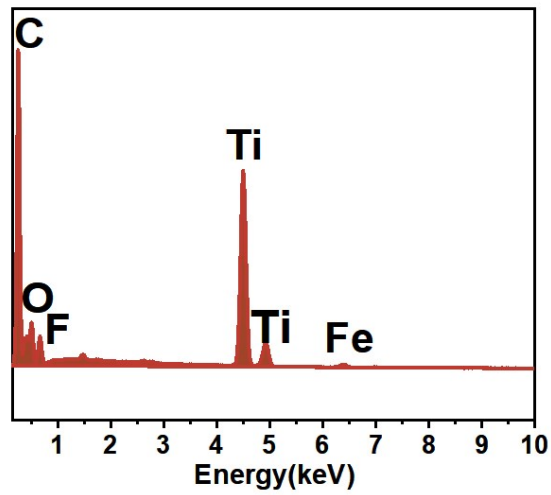

Fig. S2. EDS analysis of the HCl-treated SC  $\text{CO}_2\text{-Ti}_3\text{C}_2\text{T}_x$  multilayer MXenes samples.

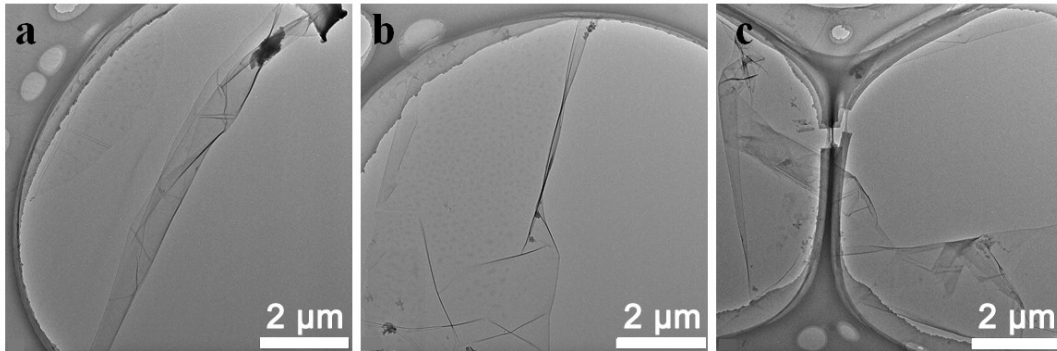

Fig. S3. TEM images of the delaminated 2D SC  $\text{CO}_2\text{-Ti}_3\text{C}_2\text{T}_x$  MXenes flakes.

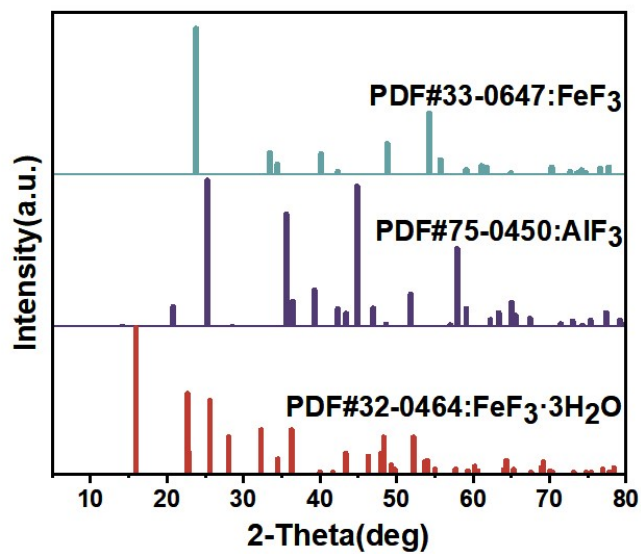

Fig. S4. the standard PDF cards of  $\text{FeF}_3 \cdot 3\text{H}_2\text{O}$  (red line),  $\text{AlF}_3$  (purple line) and  $\text{FeF}_3$  (blue line).

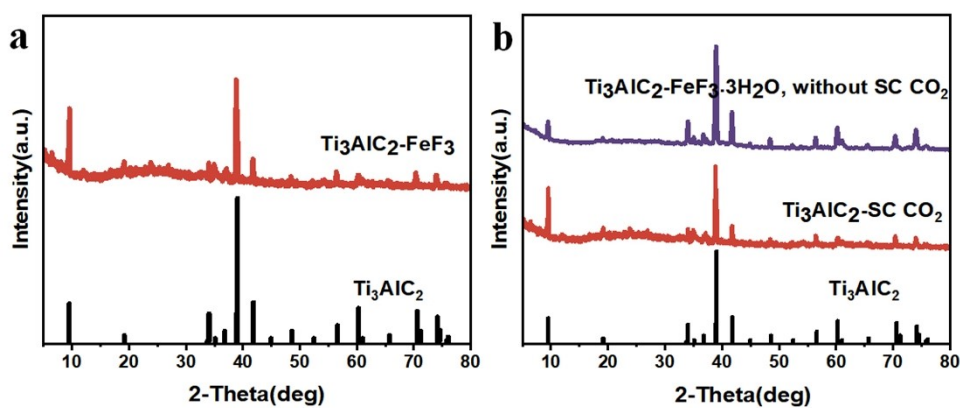

**Fig. S5.** (a) XRD patterns of pristine  $\text{Ti}_3\text{AlC}_2$  MAX phase (black line) and HCl-treated  $\text{Ti}_3\text{AlC}_2\text{-FeF}_3$  (red line). (b) XRD patterns of pristine  $\text{Ti}_3\text{AlC}_2$  MAX phase (black line), HCl-treated  $\text{Ti}_3\text{AlC}_2\text{-SC CO}_2$  (red line) and  $\text{Ti}_3\text{AlC}_2\text{-FeF}_3\cdot 3\text{H}_2\text{O}$ , without  $\text{SC CO}_2$  (purple line).

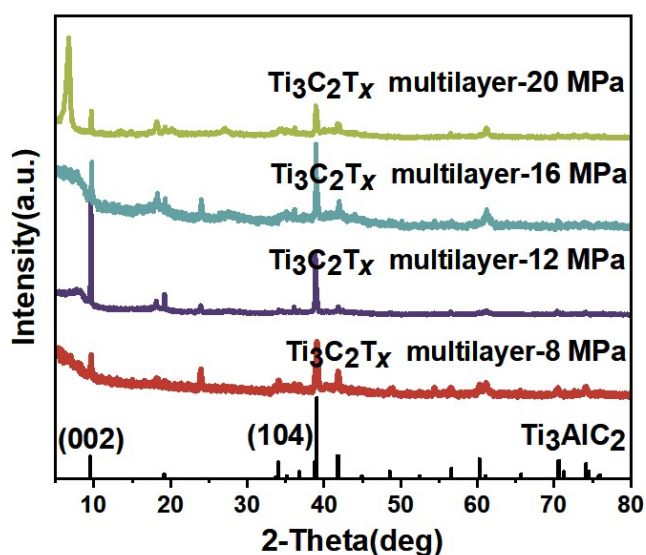

**Fig. S6.** XRD patterns of pristine  $\text{Ti}_3\text{AlC}_2$  MAX phase (black line) and HCl-treated  $\text{SC CO}_2\text{-Ti}_3\text{C}_2\text{T}_x$  multilayer MXenes samples after etching at the temperature of  $90^\circ\text{C}$  and under 8 MPa (red line), 12 MPa (purple line), 16 MPa (blue line), 20 MPa (yellow line), respectively.

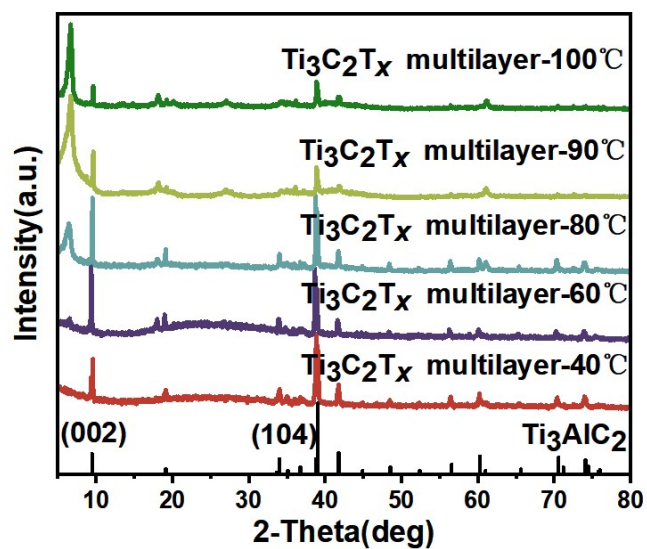

**Fig. S7.** XRD patterns of pristine  $\text{Ti}_3\text{AlC}_2$  MAX phase (black line) and HCl-treated  $\text{SC CO}_2$ - $\text{Ti}_3\text{C}_2\text{T}_x$  multilayer MXenes samples etching under the pressure of 20 MPa and at 40 °C (red line), 60 °C (purple line), 80 °C (blue line), 90 °C (yellow line), 100 °C (green line), respectively.

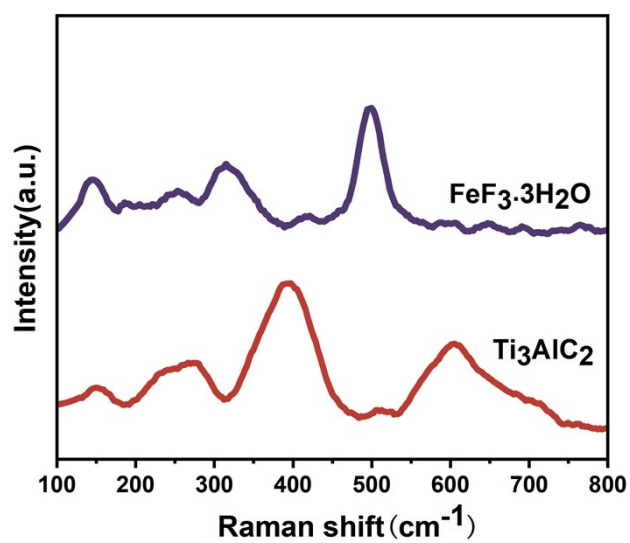

Fig. S8. Raman spectra of  $\text{Ti}_3\text{AlC}_2$  (red line) and  $\text{FeF}_3 \cdot 3\text{H}_2\text{O}$  (purple line).

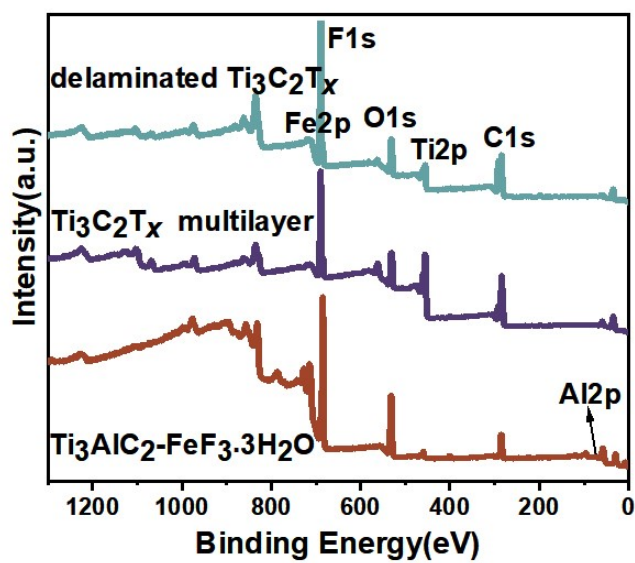

Fig. S9. The global view of the XPS spectra in the as-reacted product, HCl-treated  $\text{Ti}_3\text{C}_2\text{T}_x$  MXenes and the delaminated MXenes flakes.

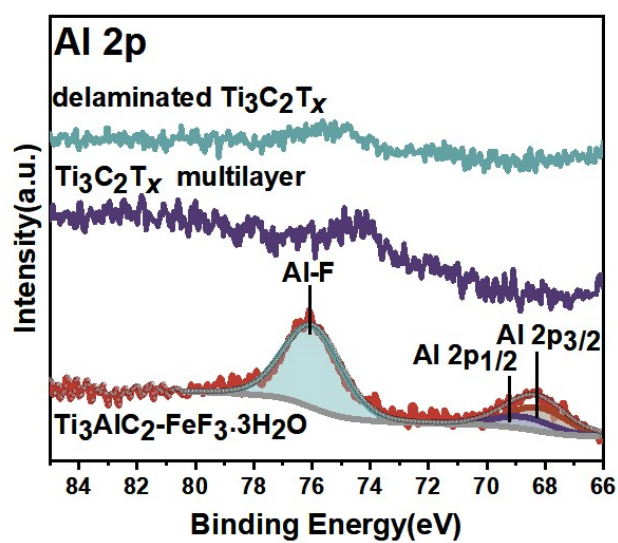

**Fig. S10.** High-resolution XPS spectra of Al 2p in the as-reacted product, HCl-treated  $\text{Ti}_3\text{C}_2\text{T}_x$  MXenes and the delaminated MXenes flakes.

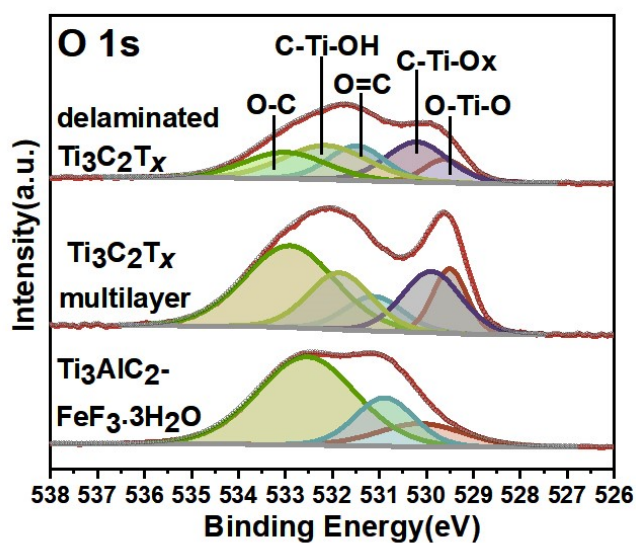

**Fig. S11.** High-resolution XPS spectra of O 1s in the as-reacted product, HCl-treated  $\text{Ti}_3\text{C}_2\text{T}_x$  MXenes and the delaminated MXenes flakes.

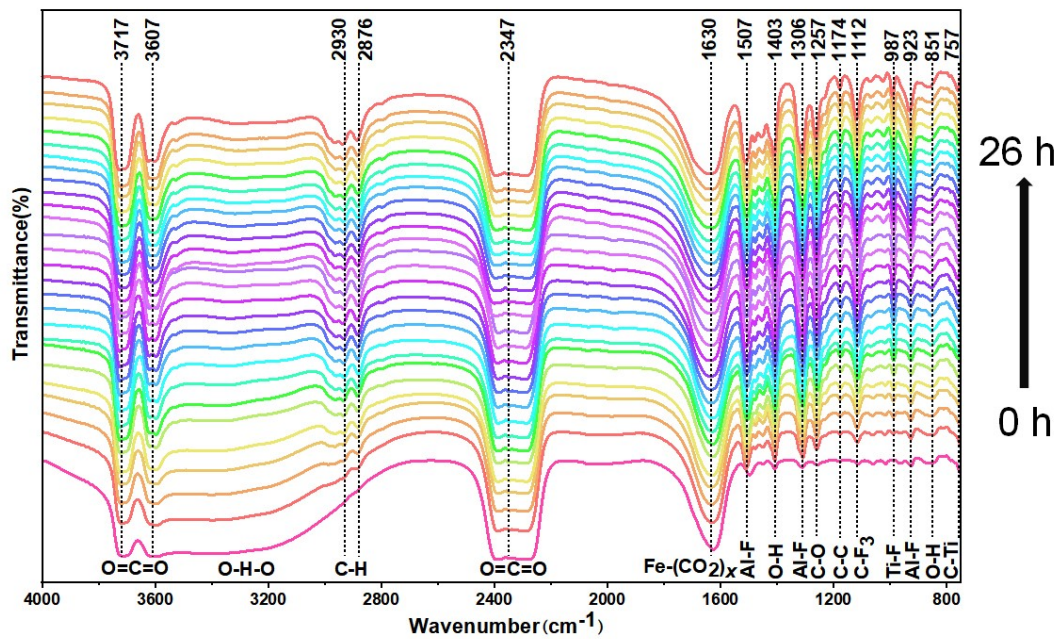

Fig. S12. Time-resolved in situ IR experimental results (20 MPa SC CO<sub>2</sub>, 90 °C), collected in the 4000-750 cm<sup>-1</sup> region.

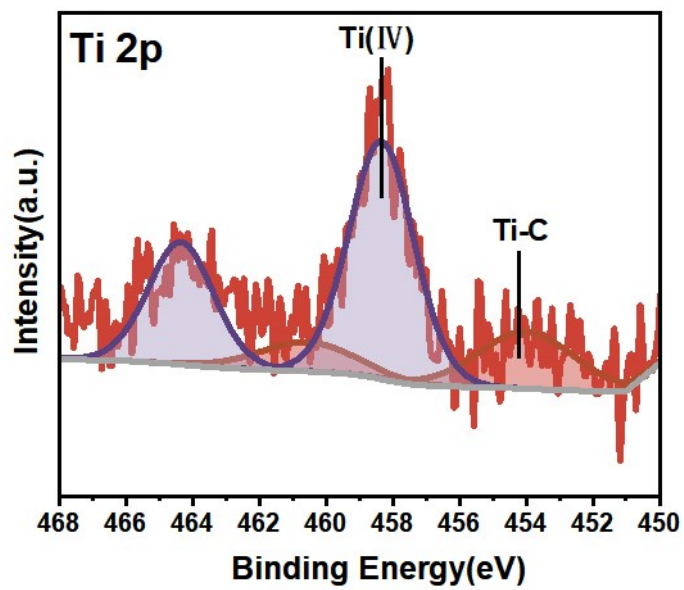

Fig. S13. High-resolution XPS spectra of Ti 2p in the SC CO<sub>2</sub>-Ti<sub>3</sub>C<sub>2</sub>T<sub>x</sub>-Pt.

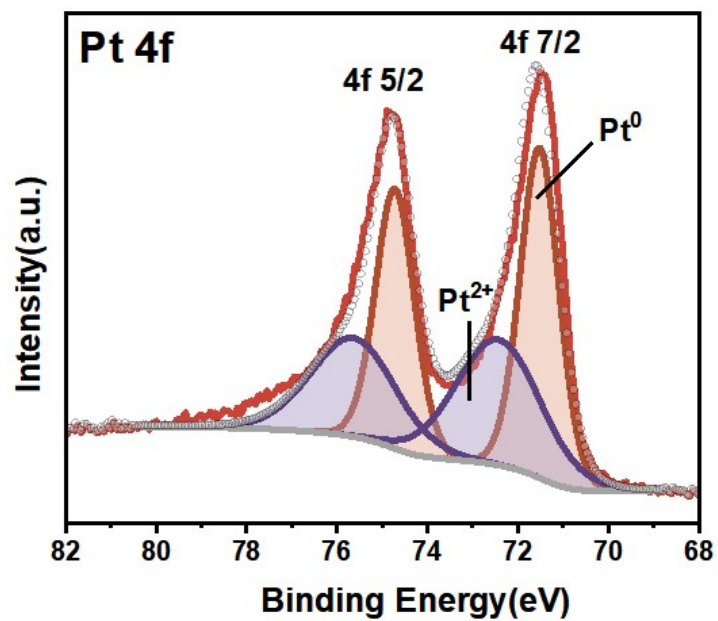

Fig. S14. High-resolution XPS spectra of Pt 4f in the SC CO<sub>2</sub>-Ti<sub>3</sub>C<sub>2</sub>T<sub>x</sub>-Pt.

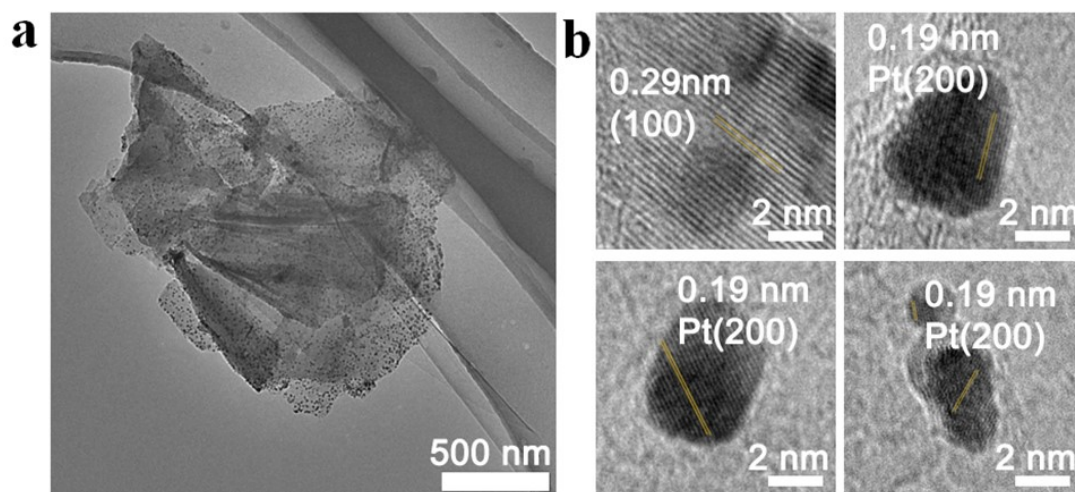

Fig. S15. TEM image (a) and high-resolution TEM images (b) of the SC CO<sub>2</sub>-Ti<sub>3</sub>C<sub>2</sub>T<sub>x</sub>-Pt.



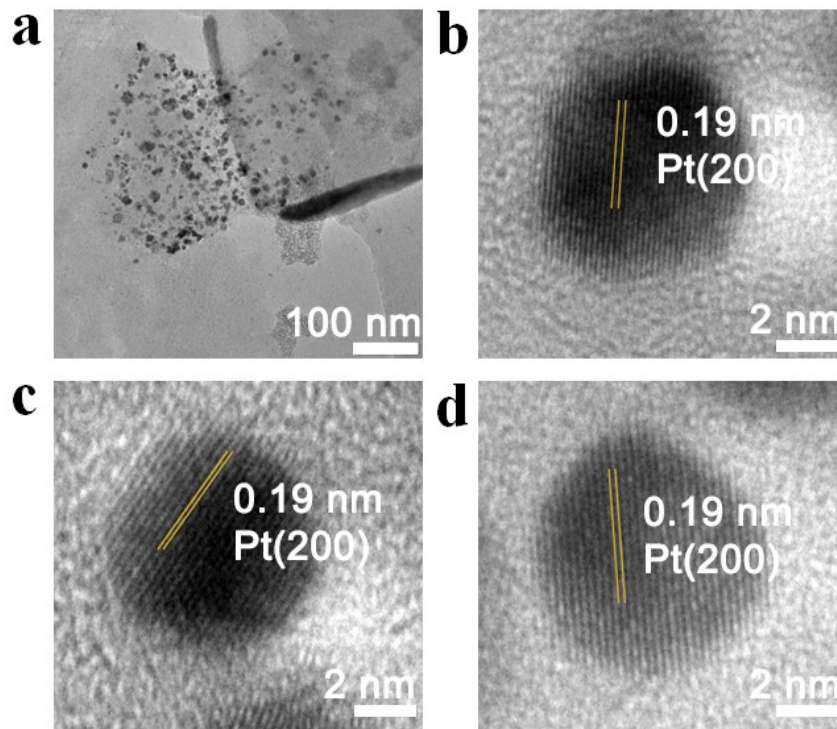

**Fig. S16.** TEM image (a) and high-resolution TEM images (b, c, d) of the LiF-Ti<sub>3</sub>C<sub>2</sub>T<sub>x</sub>-Pt.

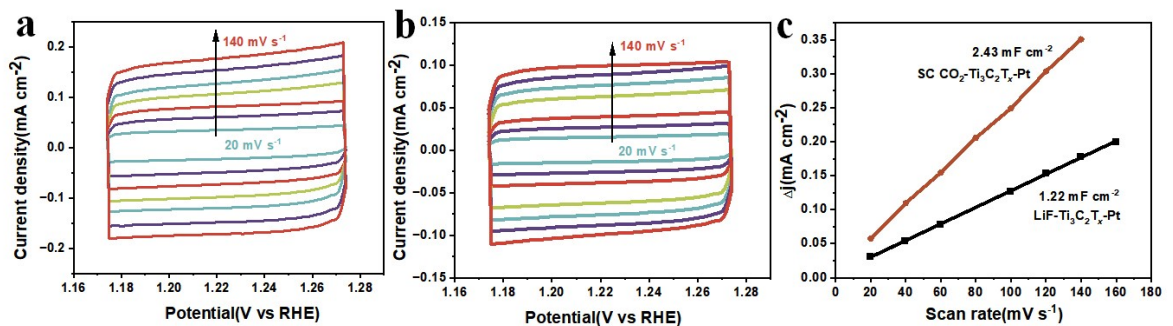

**Fig. S17.** Cyclic voltammograms performed in 1 M KOH solution in the potential window without the participation of faradaic processes for (a) SC CO<sub>2</sub>-Ti<sub>3</sub>C<sub>2</sub>T<sub>x</sub>-Pt and (b) LiF-Ti<sub>3</sub>C<sub>2</sub>T<sub>x</sub>-Pt. (c) Plots of the differences in current density variation against scan rate, where the slope is C<sub>dl</sub>.

**Table. S1.** Comparison of HER performances for SC CO<sub>2</sub>-Ti<sub>3</sub>C<sub>2</sub>T<sub>x</sub>-Pt with the reported HER catalysts in 1.0 M KOH electrolyte.

|   | Electrocatalysts                                                                  | Overpotential at 10 mA cm <sup>-2</sup> (mV) | Overpotential at 100 mA cm <sup>-2</sup> (mV) | Tafel slop (mV dec <sup>-1</sup> ) | Reference                                           |
|---|-----------------------------------------------------------------------------------|----------------------------------------------|-----------------------------------------------|------------------------------------|-----------------------------------------------------|
| 1 | SC CO <sub>2</sub> -Ti <sub>3</sub> C <sub>2</sub> T <sub>x</sub> -Pt             | <b>29</b>                                    | <b>117</b>                                    | <b>67.22</b>                       | <b>This work</b>                                    |
| 2 | Pt <sub>SA</sub> -C <sub>1</sub> N <sub>1</sub>                                   | 46                                           | 200                                           | 36.8                               | Nat Commun. 2020, 11, 1029                          |
| 3 | Pt/np-Co <sub>0.85</sub> Se                                                       | 58                                           | -                                             | 35                                 | Nat. Commun. 2017, 10, 1743                         |
| 4 | Ti <sub>3</sub> C <sub>2</sub> T <sub>x</sub> /Ni <sub>3</sub> S <sub>2</sub> /NF | 72                                           | -                                             | 45                                 | ACS Applied Energy Materials 2019, 2 (9), 6931-6938 |
| 5 | Pt NWs/SL-Ni(OH) <sub>2</sub>                                                     | ~70                                          | -                                             | -                                  | Nat Commun. 2015, 6, 6430                           |
| 6 | Ni <sub>3</sub> N/Pt                                                              | 50                                           | 110                                           | 36.5                               | Adv. Energy Mater. 2017, 7, 1601390                 |
| 7 | WS <sub>2</sub> -Pt                                                               | ~40                                          | -                                             | 65                                 | Adv. Mater. 2017, 30, 1704779                       |
| 8 | Pt/MXene                                                                          | 34                                           | 185                                           | 29.7                               | Adv. Funct. Mater. 2022, 32, 2110910                |
